# Supplementary material for: Novel Oxygen- and Curcumin-Laden Ionic Liquid@Silica Nanocapsules for Enhanced Antimicrobial Photodynamic Therapy
Source: MDPI journal article supplement (doi:10.3390/pharmaceutics15041080), 2023-03-28
Supplement: s1 [file s1]

## SUPPLEMENTARY MATERIALS

# Novel Oxygen- and Curcumin-Laden Ionic Liquid@Silica Nanocapsules for Enhanced Antimicrobial Photodynamic Therapy

Joana Henriques <sup>1</sup>, João Pina <sup>2</sup>, Mara E. M. Braga <sup>1</sup>, Ana M. A. Dias <sup>1</sup>, Patrícia Coimbra <sup>1,\*</sup> and Hermínio C. de Sousa <sup>1,\*</sup>

<sup>1</sup> Univ Coimbra, CIEPQPF, Department of Chemical Engineering, 3030-790 Coimbra, Portugal;

joana.henriques@student.uc.pt (J.H.); marabraga@eq.uc.pt (M.E.M.B.); adias@eq.uc.pt (A.M.A.D.)

<sup>2</sup> Univ Coimbra, CQC-IMS, Department of Chemistry, 3004-535 Coimbra, Portugal; jpina@qui.uc.pt

\* Correspondence: patricia@eq.uc.pt (P.C.); hsousa@eq.uc.pt (H.C.d.S.)

**Table S1.** Average hydrodynamic sizes of IL/water emulsions and of the correspondent nanocapsules (mean  $\pm$  SD, n=3).

| Sample                                                | Z average size (nm) | PDI               | Peak 1 (nm)  | Peak 2 (nm)  |
|-------------------------------------------------------|---------------------|-------------------|--------------|--------------|
| CUR-[BMPYRR][NTf <sub>2</sub> ]/Water                 | 283 $\pm$ 29        | 0.399 $\pm$ 0.023 | 343 $\pm$ 28 | 14 $\pm$ 1   |
| CUR-[OMIM][NTf <sub>2</sub> ]/Water                   | 207 $\pm$ 37        | 0.405 $\pm$ 0.001 | 285 $\pm$ 68 | 69 $\pm$ 16  |
| CUR-[P <sub>6,6,6,14</sub> ][NTf <sub>2</sub> ]/Water | 221 $\pm$ 3         | 0.278 $\pm$ 0.027 | 309 $\pm$ 11 | -            |
| CUR-[BMPYRR][NTf <sub>2</sub> ]@ncSi                  | 2901 $\pm$ 479      | 0.947 $\pm$ 0.048 | 933 $\pm$ 83 | 167 $\pm$ 7  |
| CUR-[OMIM][NTf <sub>2</sub> ]@ncSi                    | 324 $\pm$ 42        | 0.425 $\pm$ 0.021 | 417 $\pm$ 76 | 89 $\pm$ 41  |
| CUR-[P <sub>6,6,6,14</sub> ][NTf <sub>2</sub> ]@ncSi  | 394 $\pm$ 7         | 0.394 $\pm$ 0.009 | 532 $\pm$ 50 | 135 $\pm$ 22 |

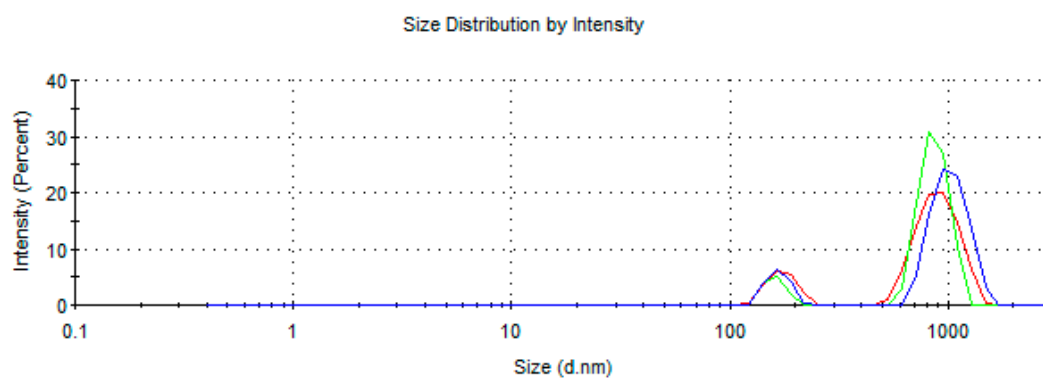

**Figure S1.** Size distribution of CUR-[BMPYRR][NTf<sub>2</sub>]*@*ncSi nanoparticles

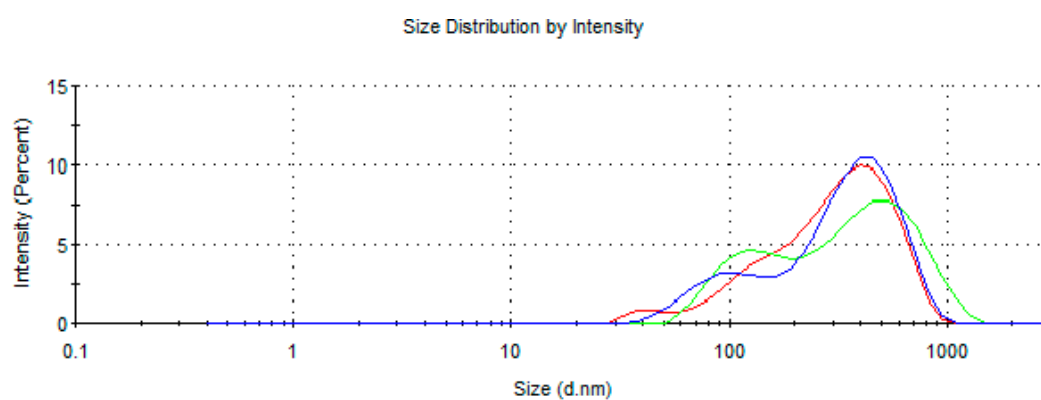

**Figure S2.** Size distribution of CUR-[OMIM][NTf<sub>2</sub>]*@*ncSi nanoparticles

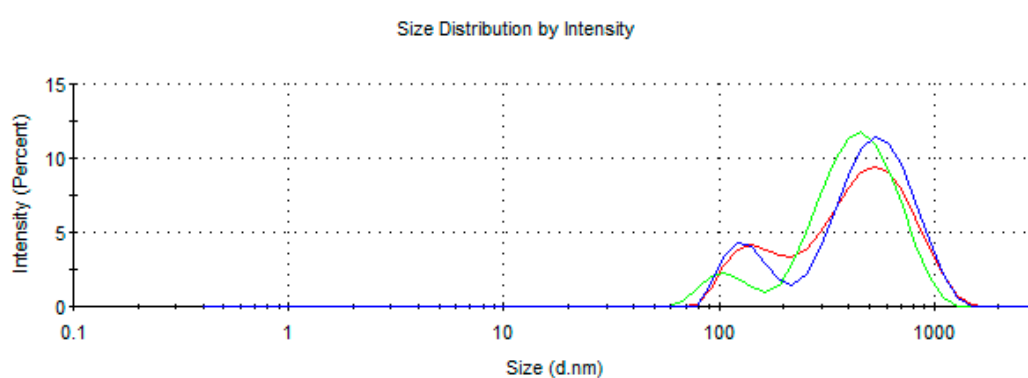

**Figure S3.** Size distribution of CUR-[P<sub>6,6,6,14</sub>][NTf<sub>2</sub>]*@*ncSi nanoparticles

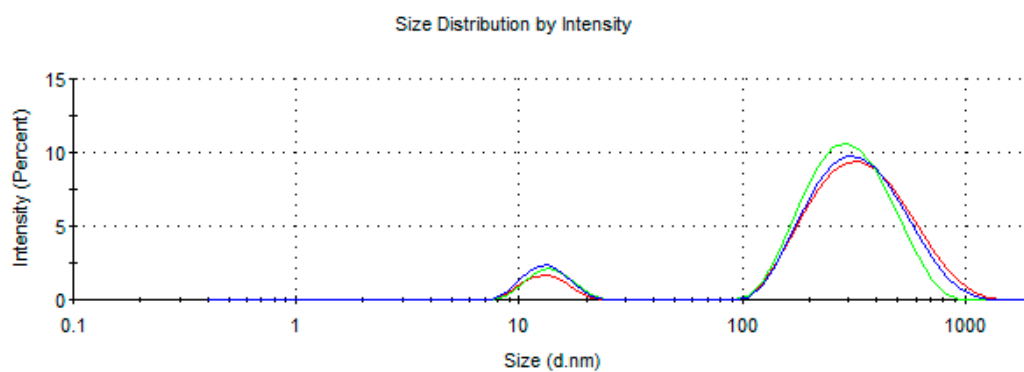

**Figure S4.** Size distribution of the IL droplets in the CUR-[BMPYRR][NTf<sub>2</sub>]/Water emulsion.

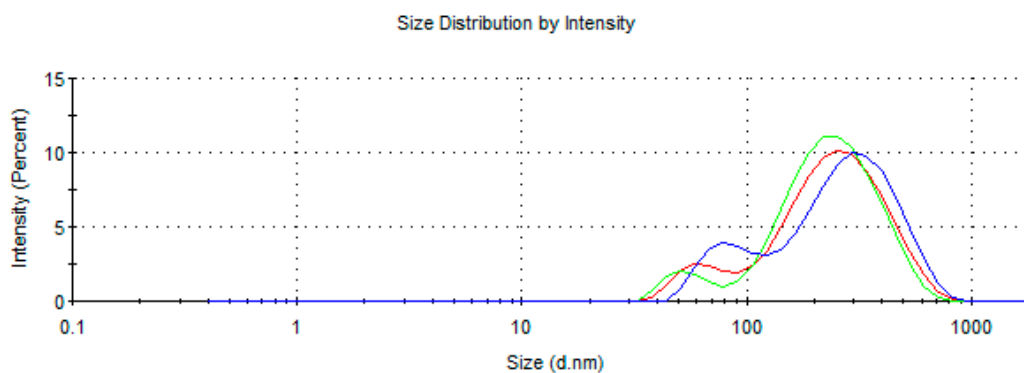

**Figure S5.** Size distribution of the IL droplets in the CUR-[OMIM][NTf<sub>2</sub>]/Water emulsion.

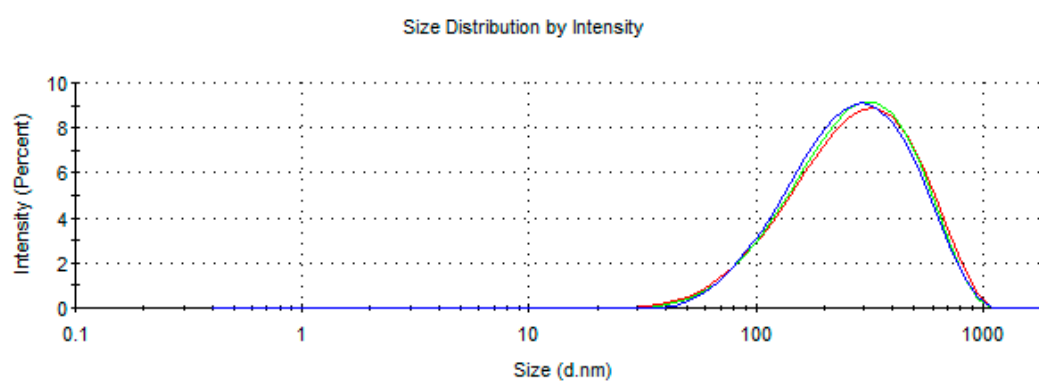

**Figure S6.** Size distribution of the IL droplets in the CUR-[P<sub>6,6,6,14</sub>][NTf<sub>2</sub>]/Water emulsion.

**Table S2.** Maximum concentration of dissolved oxygen ( $pO_{2Max}$ ) and the correspondent time ( $t_{Max}$ ) registered for the different samples. IL/water and nanocapsules/water overall volumetric mass transfer coefficients ( $K_{La}$ ).

| Sample                                                | $t_{Max}$<br>(min) | $pO_{2Max}$<br>(ppm) | $K_{La}^*$<br>( $h^{-1}$ ) |
|-------------------------------------------------------|--------------------|----------------------|----------------------------|
| Water                                                 | 2.5                | $5.4 \pm 0.3$        | ---                        |
| CUR-[BMPYRR][NTf <sub>2</sub> ]/Water                 | 5.0                | $6.7 \pm 0.5$        | $58 \pm 0$                 |
| CUR-[BMPYRR][NTf <sub>2</sub> ]@ncSi                  | 3.0                | $8.4 \pm 0.5$        | $127 \pm 21$               |
| CUR-[OMIM][NTf <sub>2</sub> ]/Water                   | 3.0                | $7.0 \pm 0.2$        | $157 \pm 24$               |
| CUR-[OMIM][NTf <sub>2</sub> ]@ncSi                    | 2.0                | $7.7 \pm 1.5$        | $259 \pm 3$                |
| CUR-[P <sub>6,6,6,14</sub> ][NTf <sub>2</sub> ]/Water | 3.0                | $7.6 \pm 0.8$        | $167 \pm 19$               |
| CUR-[P <sub>6,6,6,14</sub> ][NTf <sub>2</sub> ]@ncSi  | 2.5                | $8.1 \pm 0.3$        | $179 \pm 39$               |

\*Calculated by plotting the initial linear segment of data represented in Figure 4 in the form of  $\ln(pO_{2Max}/(pO_{2Max} - pO_2))$  vs time and by the performing of a linear adjustment.  $K_{La}$  corresponds to the slope of the fitted line.

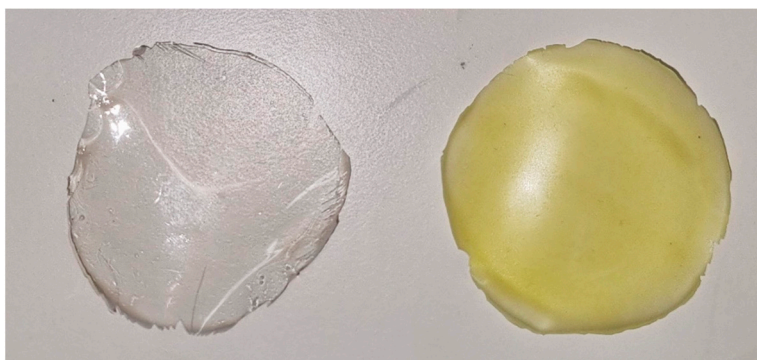

**Figure S7.** Gelatin film (left) and gelatin film loaded with CUR-[OMIM][NTf<sub>2</sub>]@ncSi nanocapsules (right).

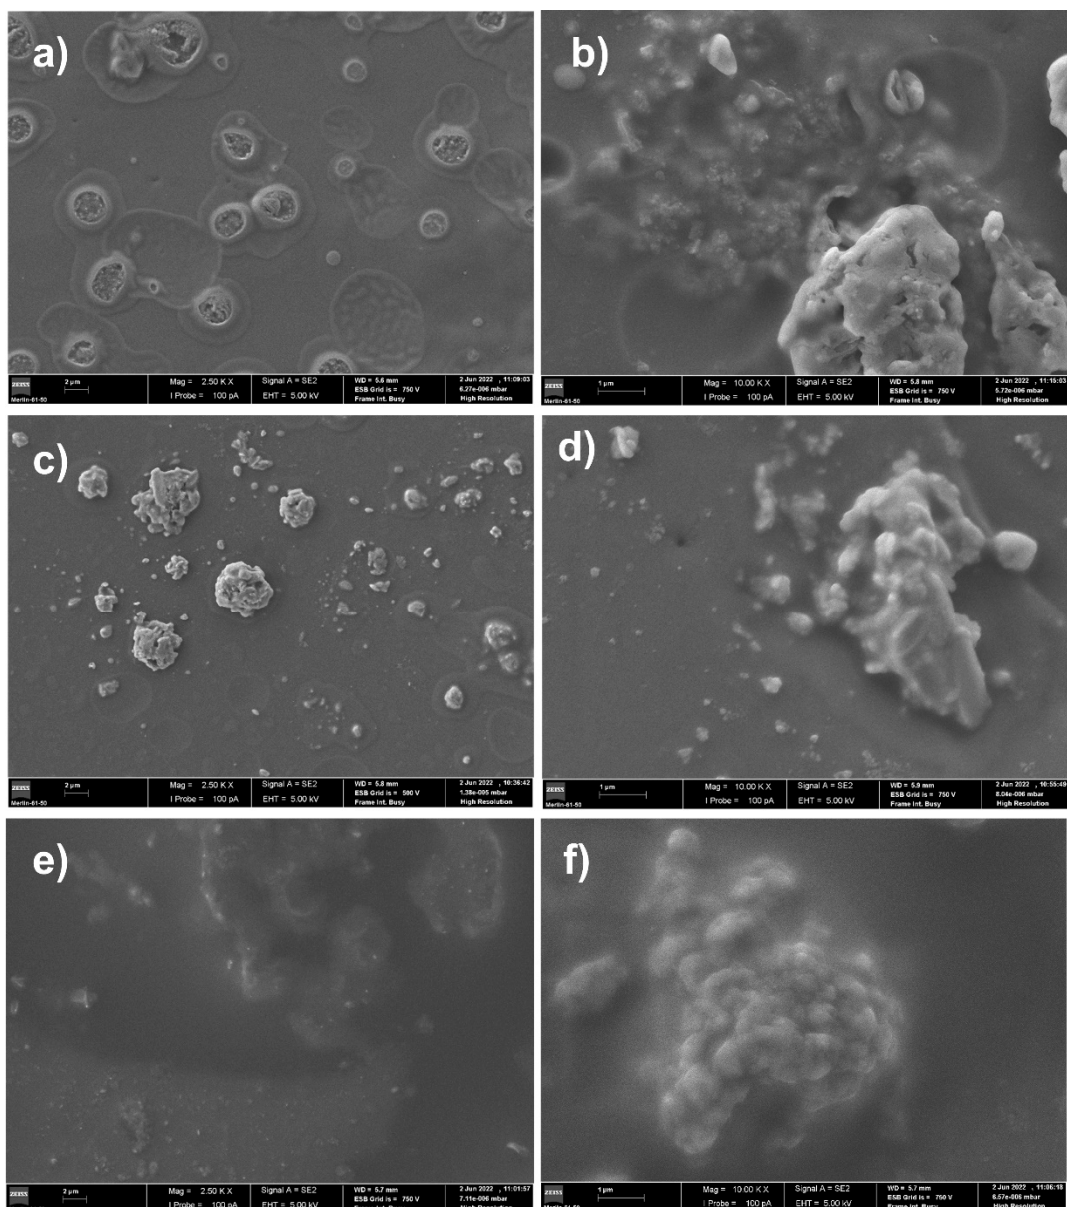

**Figure S8.** SEM images of the surface of gelatin films incorporating CUR-IL@ncSi nanocapsules: a), b) CUR-[BMPYRR][NTf<sub>2</sub>]/ncSi; c), d) CUR-[OMIM][NTf<sub>2</sub>]/ncSi; e) f) CUR-[P<sub>6,6,6,14</sub>][NTf<sub>2</sub>]/ncSi. Magnifications: 2500× (a, c, e); 10000× (b, d, f).
